# Supplementary material for: Climatic controls on metabolic constraints in the ocean
Source: Copernicus journal article supplement (doi:10.5194/bg-21-3477-2024), 2024-08-01
Supplement: Supplementary file 1 [file bg-21-3477-2024-supplement.pdf]

Supplement of Biogeosciences, 21, 3477–3490, 2024  
<https://doi.org/10.5194/bg-21-3477-2024-supplement>  
© Author(s) 2024. CC BY 4.0 License.

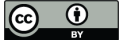

*Supplement of*

## **Climatic controls on metabolic constraints in the ocean**

**Precious Mongwe et al.**

*Correspondence to:* Precious Mongwe (pmongwe@csir.co.za)

The copyright of individual parts of the supplement might differ from the article licence.

1  
2

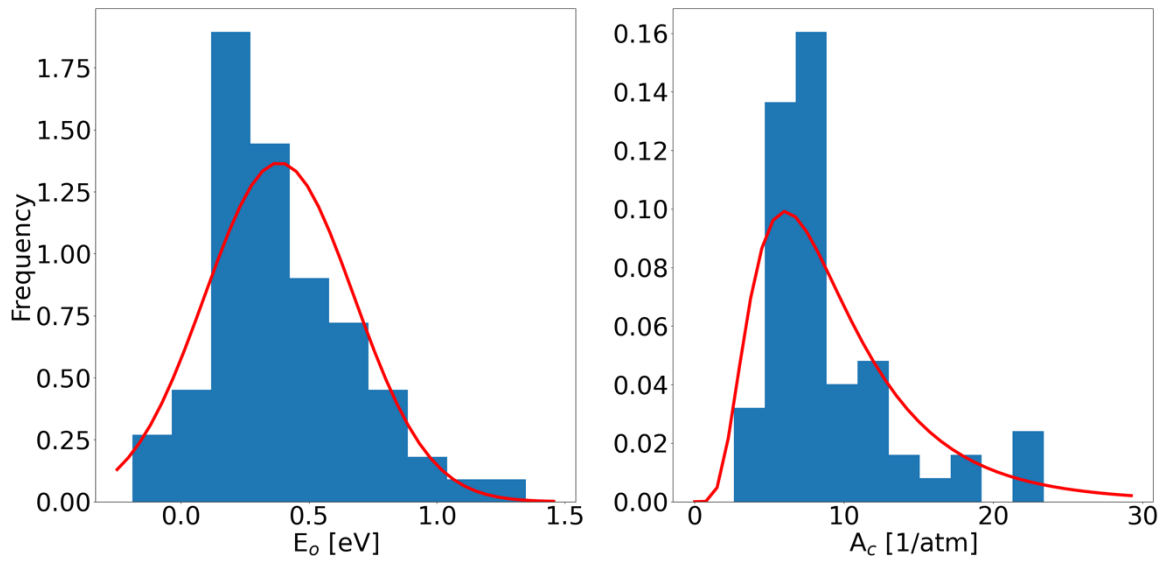

3  
4  
5  
6  
7

**Figure S1.** Physiological traits probability density function for the activation energy ( $E_o$ ) and the ecological hypoxic tolerance ( $A_c$ ) based on the Penn et al. (2018) physiological data. It shows that  $E_o$  is represented by a normal distribution and  $A_c$  by a lognormal distribution function.

## 8 **References**

9

10 Penn, J. L., Deutsch, C., Payne, J. L., and Sperling, E. A.: Temperature-dependent hypoxia  
11 explains biogeography and severity of end-Permian marine mass extinction, *Science* (1979),  
12 362, <https://doi.org/10.1126/science.aat1327>, 2018.

13  
14
